# Supplementary material
Source: PubMed Central journal article supplement (PMC5637362)

RP4 Plasmid, Structured Habitat

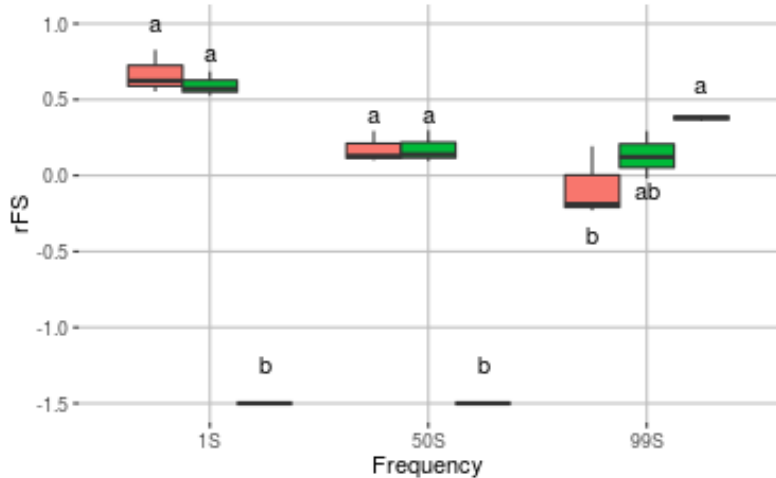

RP4 Plasmid, Unstructured Habitat

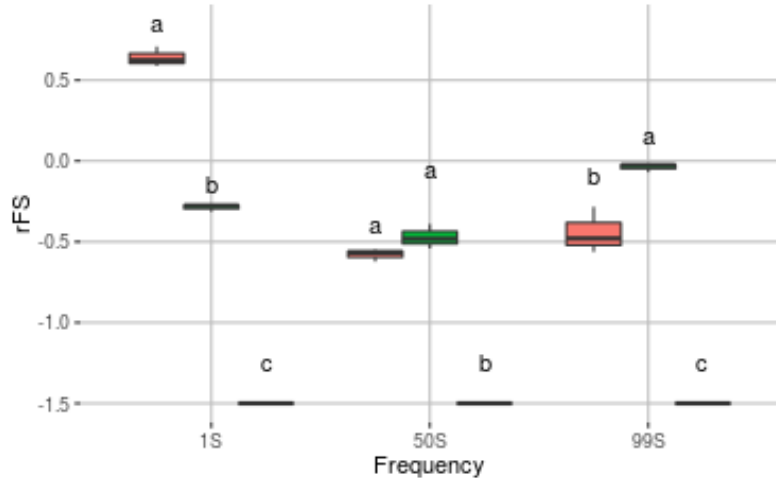

R16a Plasmid, Structured Habitat

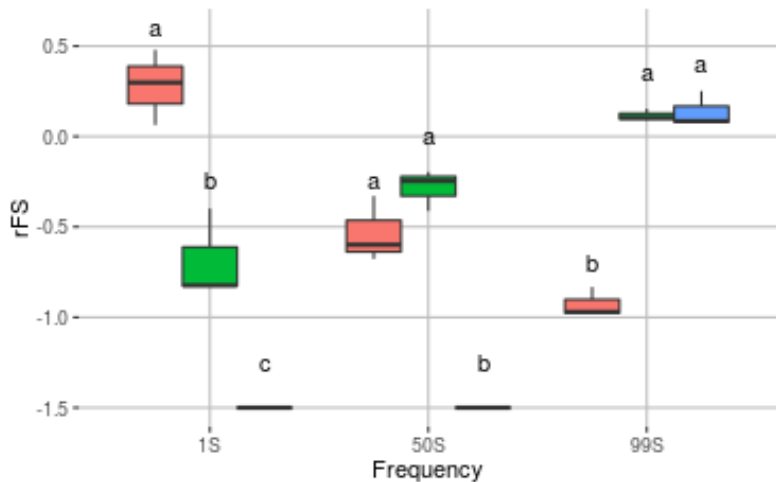

R16a Plasmid, Unstructured Habitat

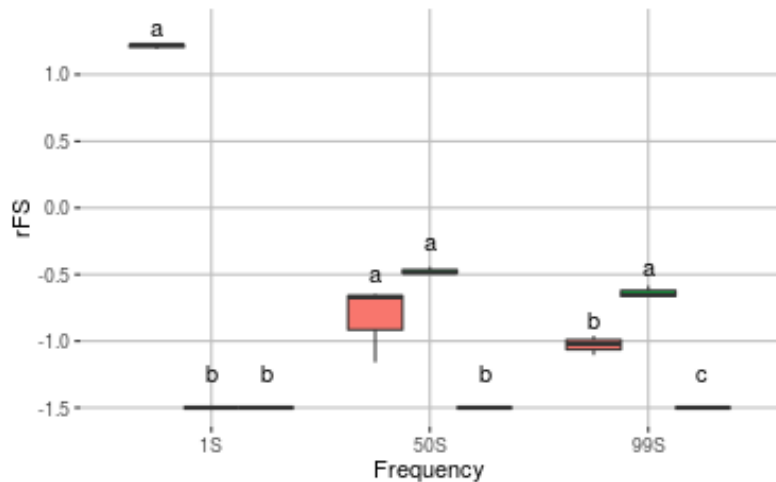

R1 Plasmid, Structured Habitat

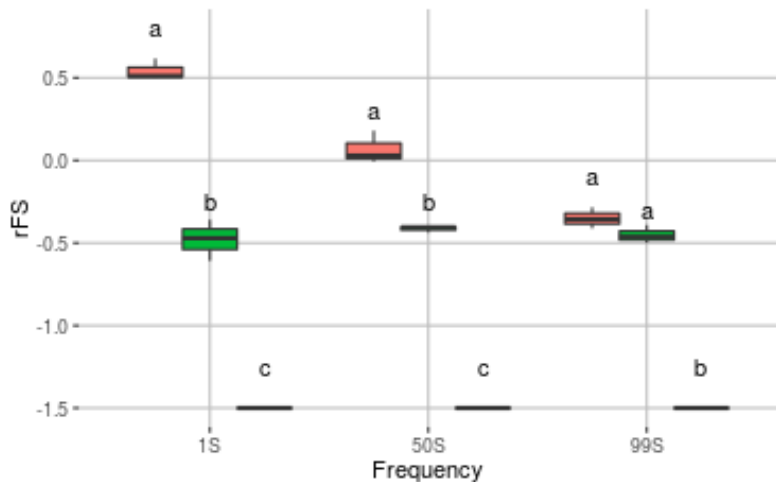

R1 Plasmid, Unstructured Habitat

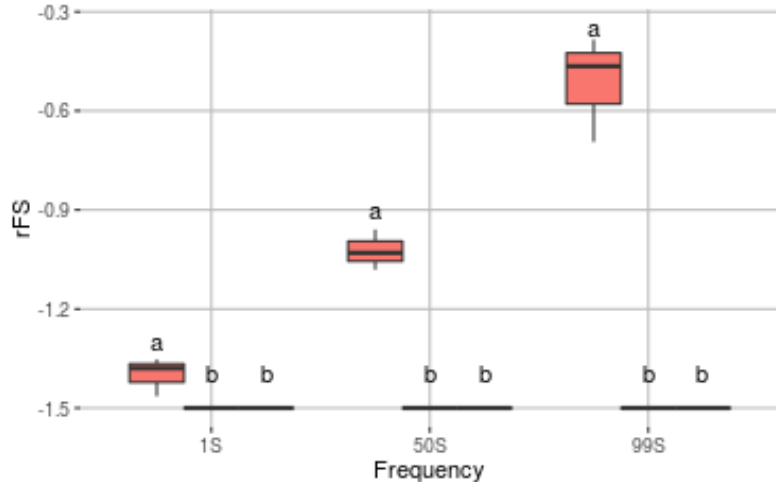

RP4 Plasmid, Structured Habitat

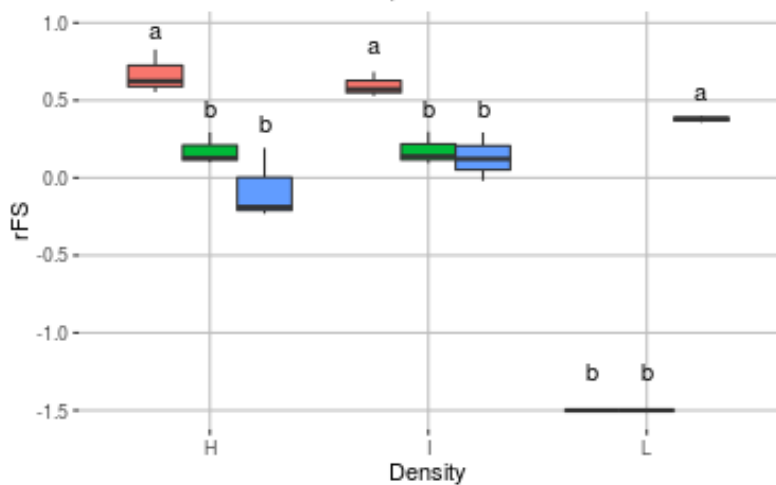

RP4 Plasmid, Unstructured Habitat

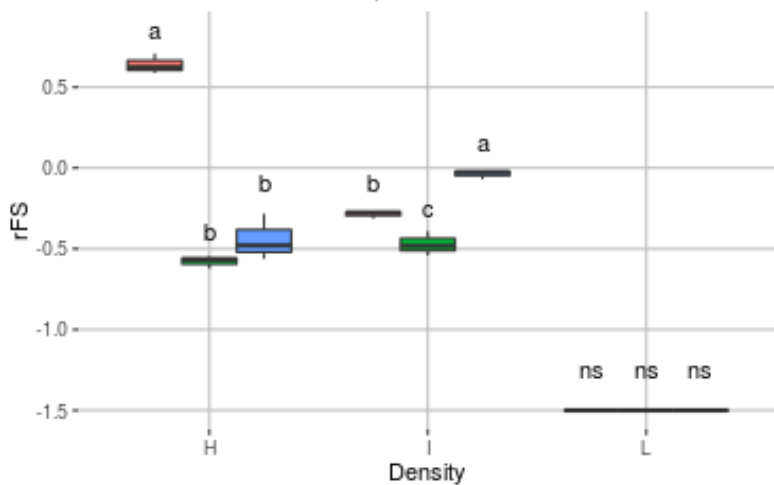

R16a Plasmid, Structured Habitat

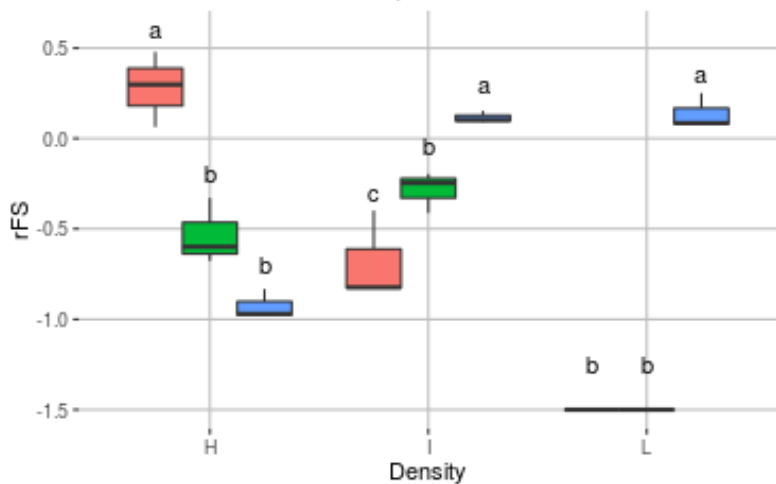

R16a Plasmid, Unstructured Habitat

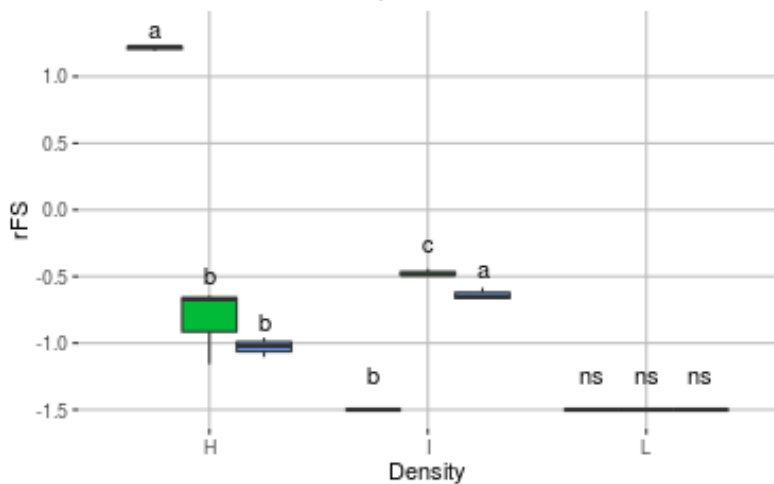

R1 Plasmid, Structured Habitat

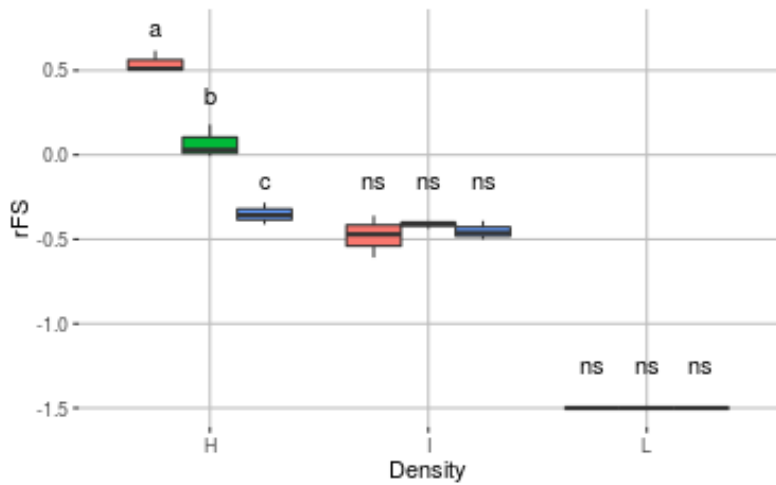

R1 Plasmid, Unstructured Habitat

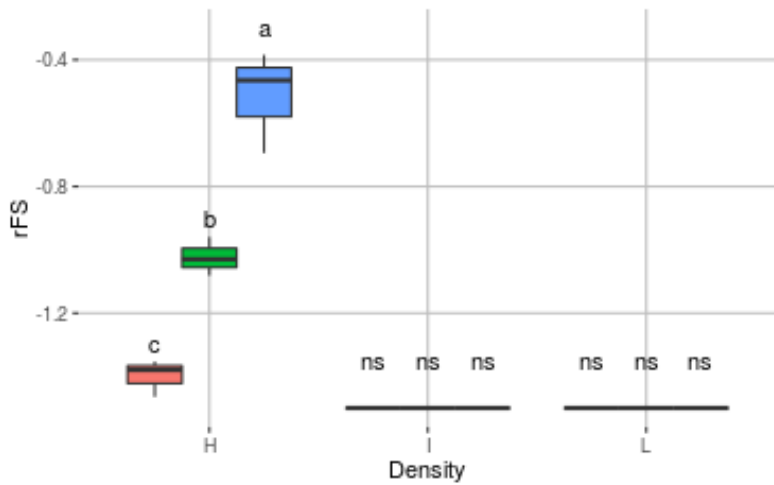

Supplement: hdy201733x1.pdf [file hdy201733x1.pdf]
